# Supplementary material for: Association between breast cancer susceptibility loci and mammographic density: the Multiethnic Cohort
Source: PubMed Central journal article supplement (PMC2687715; doi:10.1186/bcr2229), 2009-02-21
Supplement: bcr2229-S1.pdf [file bcr2229-S1.pdf]

**Supplementary file: Adjusted mean percent dense area and dense area by genotype**

| Locus<br>Polymorphism            | Genotype <sup>a</sup> | <i>n</i> | Percent dense area |             |                      |                      |                      | Dense area (cm <sup>2</sup> ) |             |                                   |                                   |                                   |
|----------------------------------|-----------------------|----------|--------------------|-------------|----------------------|----------------------|----------------------|-------------------------------|-------------|-----------------------------------|-----------------------------------|-----------------------------------|
|                                  |                       |          | Mean <sup>b</sup>  | (95% CI)    | <i>P<sub>c</sub></i> | <i>P<sub>d</sub></i> | <i>P<sub>r</sub></i> | Mean <sup>b</sup>             | (95% CI)    | <i>P<sub>c</sub></i> <sup>c</sup> | <i>P<sub>d</sub></i> <sup>c</sup> | <i>P<sub>r</sub></i> <sup>c</sup> |
| <i>FGFR2</i><br>rs2981582        | CC                    | 299      | 35.0               | (32.8-37.1) | 0.16                 | 0.28                 | 0.21                 | 32.2                          | (29.7-34.8) | 0.27                              | 0.47                              | 0.23                              |
|                                  | CT                    | 262      | 33.8               | (31.6-36.1) |                      |                      |                      | 31.6                          | (29.0-34.3) |                                   |                                   |                                   |
|                                  | TT                    | 78       | 31.5               | (27.4-35.7) |                      |                      |                      | 28.8                          | (23.9-33.6) |                                   |                                   |                                   |
| near <i>TOX3</i><br>rs3803662    | CC                    | 262      | 31.8               | (29.5-34.2) | 0.11                 | 0.12                 | 0.31                 | 31.9                          | (28.9-35.0) | 0.43                              | 0.63                              | 0.40                              |
|                                  | CT                    | 388      | 33.8               | (32.0-35.7) |                      |                      |                      | 32.4                          | (29.9-34.9) |                                   |                                   |                                   |
|                                  | TT                    | 156      | 34.8               | (31.8-37.8) |                      |                      |                      | 34.1                          | (30.2-38.0) |                                   |                                   |                                   |
| <i>TOX3</i><br>rs12443621        | AA                    | 190      | 30.6               | (27.9-33.3) | 0.22                 | 0.03                 | 0.90                 | 29.3                          | (25.8-32.8) | 0.12                              | 0.06                              | 0.49                              |
|                                  | AG                    | 390      | 34.7               | (32.8-36.5) |                      |                      |                      | 33.2                          | (30.7-35.7) |                                   |                                   |                                   |
|                                  | GG                    | 218      | 33.2               | (30.7-35.7) |                      |                      |                      | 33.3                          | (30.0-36.6) |                                   |                                   |                                   |
| <i>LSP1</i><br>rs3817198         | TT                    | 384      | 33.4               | (31.5-35.4) | 0.45                 | 0.38                 | 0.88                 | 30.4                          | (28.0-32.9) | 0.15                              | 0.07                              | 0.99                              |
|                                  | TC                    | 204      | 34.9               | (32.3-37.5) |                      |                      |                      | 34.6                          | (31.2-38.0) |                                   |                                   |                                   |
|                                  | CC                    | 46       | 34.5               | (28.9-40.0) |                      |                      |                      | 32.0                          | (24.8-39.2) |                                   |                                   |                                   |
| <i>HCN1</i><br>rs981782          | GG                    | 124      | 35.9               | (32.5-39.3) | 0.09                 | 0.41                 | 0.06                 | 33.2                          | (28.8-37.7) | 0.40                              | 0.69                              | 0.34                              |
|                                  | GT                    | 315      | 35.5               | (33.4-37.6) |                      |                      |                      | 33.0                          | (30.2-35.8) |                                   |                                   |                                   |
|                                  | TT                    | 198      | 32.5               | (29.9-35.2) |                      |                      |                      | 31.1                          | (27.6-34.5) |                                   |                                   |                                   |
| <i>MRPS30/HCN1</i><br>rs10941679 | AA                    | 237      | 34.8               | (32.3-37.3) | 0.04                 | 0.25                 | 0.02                 | 33.4                          | (30.1-36.7) | 0.32                              | 0.69                              | 0.21                              |
|                                  | AG                    | 390      | 33.9               | (32.0-35.8) |                      |                      |                      | 33.3                          | (30.8-35.8) |                                   |                                   |                                   |
|                                  | GG                    | 149      | 30.2               | (27.2-33.3) |                      |                      |                      | 30.4                          | (26.3-34.5) |                                   |                                   |                                   |
| <i>MAP3K1</i><br>rs889312        | AA                    | 220      | 34.7               | (32.0-37.3) | 0.57                 | 0.15                 | 0.62                 | 33.1                          | (29.9-36.2) | 0.87                              | 0.42                              | 0.60                              |
|                                  | AC                    | 355      | 31.8               | (29.8-33.8) |                      |                      |                      | 31.0                          | (28.6-33.3) |                                   |                                   |                                   |
|                                  | CC                    | 217      | 33.5               | (30.9-36.1) |                      |                      |                      | 32.6                          | (29.5-35.7) |                                   |                                   |                                   |
| 2q35<br>rs13387042               | GG                    | 414      | 32.4               | (30.4-34.4) | 0.53                 | 0.14                 | 0.39                 | 32.4                          | (29.8-35.1) | 0.80                              | 0.58                              | 0.21                              |
|                                  | GA                    | 268      | 35.3               | (32.9-37.7) |                      |                      |                      | 34.4                          | (31.3-37.5) |                                   |                                   |                                   |
|                                  | AA                    | 96       | 32.3               | (28.2-36.4) |                      |                      |                      | 30.0                          | (24.5-35.5) |                                   |                                   |                                   |

<sup>a</sup> In order of increasing breast cancer risk observed in previous studies [8,9,16].

<sup>b</sup> Adjusted for age, age<sup>2</sup> and body mass index at mammogram and ethnicity (Caucasian, Japanese, Native Hawaiian).

<sup>c</sup> *P<sub>c</sub>*: co-dominant *P*-value for the per-allele increase in mammographic density; *P<sub>d</sub>*: dominant *P*-value for an increase in mammographic density with any risk allele; *P<sub>r</sub>*: recessive *P*-value for an increase in mammographic density with both risk alleles.

CI, confidence interval.
